# Supplementary material
Source: publisher figshare collection journal article supplement (https://acs.figshare.com/ndownloader/files/4530124)
Supplement: Supplementary file 1 [file 4530124]

## Supporting Information

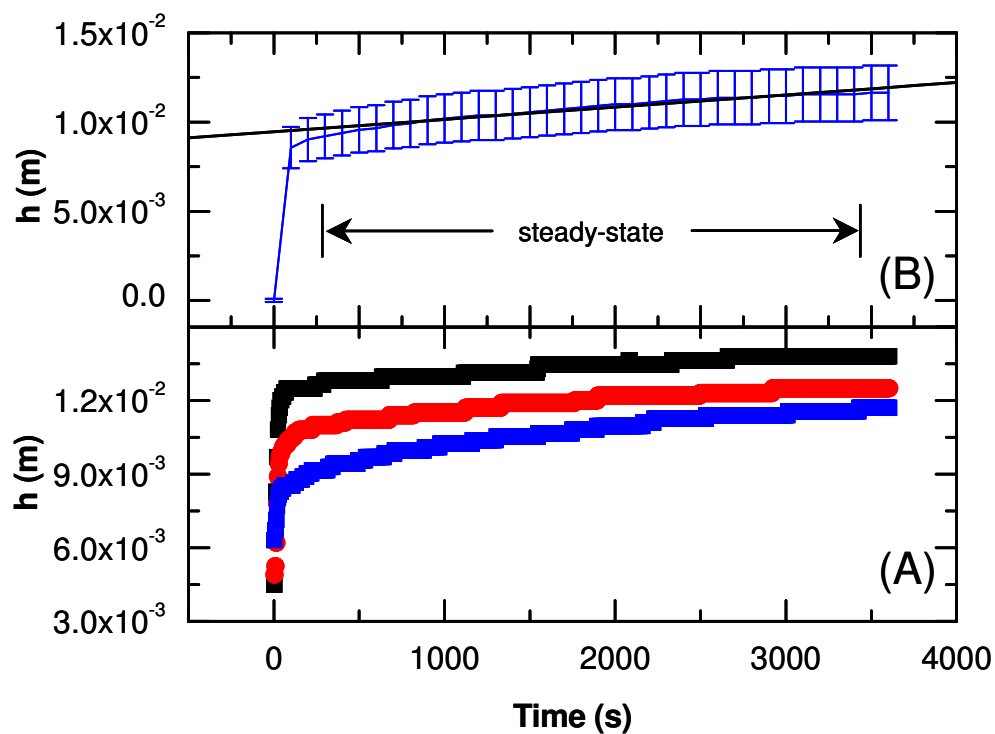

**Figure SI1.** Wetting rate data for epoxy-curative systems containing 0 wt% (■), 2 wt% (●) and 4 wt% (▲) nanoclay on tow (A) and wetting rate data for 4 wt% nanoclay system in (A) with reduced number of data points, error bars and steady-state limits for linear least-squares fitting (B).

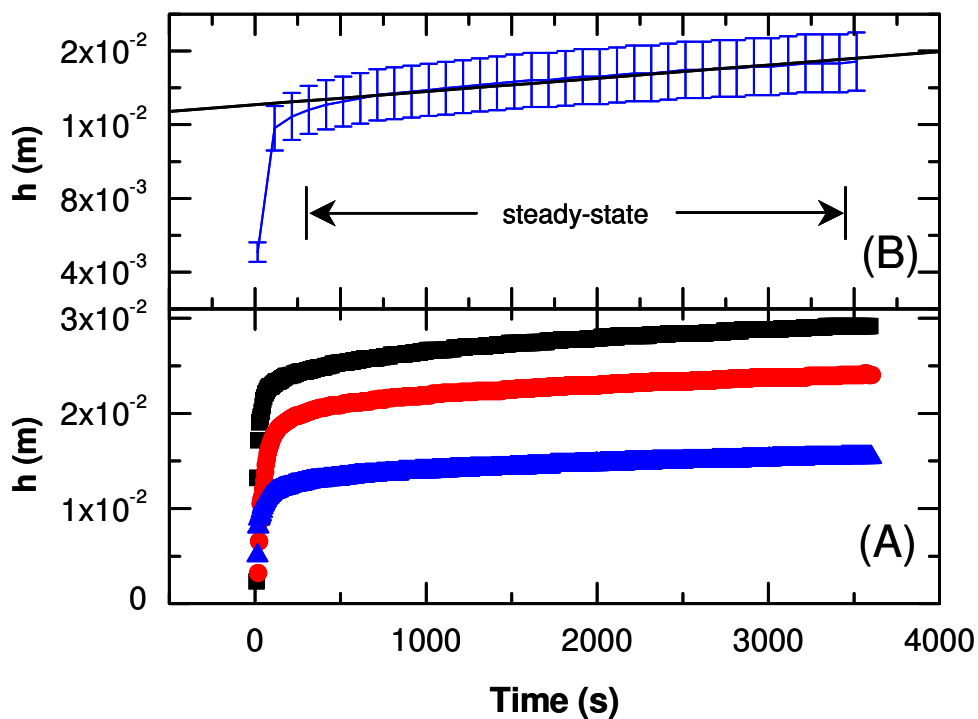

**Figure SI2.** Wetting rate data for epoxy-curative systems containing 0 wt% (■), 2 wt% (●) and 4 wt% (▲) nanoclay on fabric (A) and wetting rate data for 4 wt% nanoclay system in (A) with reduced number of data points, error bars and steady-state limits for linear least-squares fitting (B).

**Table SI1.** Summary of density, surface tension and viscosity measurements of various reactive and unreactive epoxy-nanoclay mixtures.

| Material System              | $\rho$ (g/cm <sup>3</sup> ) | Surface Tension<br>(mN/m) | $\mu$ (Pa·s) *                       |
|------------------------------|-----------------------------|---------------------------|--------------------------------------|
| Epoxy                        | 1.092 ± 0.006               | 50.9                      | 12.5 ± 0.2                           |
| Curative                     | 0.948 <sup>†</sup>          | 31.4                      | 1.04 × 10 <sup>-2</sup> <sup>†</sup> |
| Epoxy-curative               | 1.027 ± 0.002               | 38.4                      | 0.767 ± 0.01                         |
| Epoxy-curative-2<br>wt% clay | 1.064 ± 0.003               | 38.9                      | 0.585 ± 0.1                          |
| Epoxy-curative-4<br>wt% clay | 1.066 ± 0.003               | 43.4                      | 10.8 ± 0.2                           |

\* Averaged over 10<sup>-1</sup> to 10<sup>2</sup> s<sup>-1</sup> shear rates. <sup>†</sup> At 20 °C from Huntsman Inc.

**Table SI2.** Summary of the density, surface tension and viscosity measurements of silicone oil <sup>†</sup> and silicone oil-nanoclay mixtures.

| Wt % clay | $\mu$ (Pa·s) <sup>‡</sup>      | $\rho_{\text{est}}$ (g/cm <sup>3</sup> )* |
|-----------|--------------------------------|-------------------------------------------|
| 0         | 4.79 ± 0.03 × 10 <sup>-3</sup> | 0.913                                     |
| 2         | 7.35 ± 0.9 × 10 <sup>-3</sup>  | 0.929                                     |
| 4         | 6.65 ± 0.5 × 10 <sup>-3</sup>  | 0.945                                     |

<sup>†</sup> Dow Corning200<sup>®</sup> silicone oil fluid.  $\gamma$  = 19.7 mN/m. <sup>‡</sup> Averaged over 10<sup>-1</sup> to 10<sup>2</sup> s<sup>-1</sup> shear rates. \*  $\rho_{\text{est}}$  = (weight fraction clay × 1.71 g/cm<sup>3</sup> <sup>||</sup>) + (weight fraction silicone oil × 0.913 g/cm<sup>3</sup>). <sup>||</sup> Nanocor Inc.
